# Supplementary material for: The Role of Palliative Surgery for Malignant Bowel Obstruction and Perforation in Advanced Microsatellite Instability-High Colorectal Carcinoma in the Era of Immunotherapy: Case Report
Source: PubMed Central journal article supplement (PMC7186327; doi:10.3389/fonc.2020.00581), 2020-04-21
Supplement: Table_1.pdf [file Table_1.pdf]

1 Supplemental Table 1. Patient demographics and medical history

| Patient | Age (years) | Gender | Diagnosis | Chemotherapy Regimen          | Complication(s)       | Past Medical and Surgical History                | Familial Cancer Syndrome? |
|---------|-------------|--------|-----------|-------------------------------|-----------------------|--------------------------------------------------|---------------------------|
| 1       | 33          | Female | mCRC      | FOLFOX                        | Partial SBO/LBO       | None                                             | No                        |
| 2       | 62          | Male   | mCRC      | FOLFOX, Irinotecan, Cetuximab | Complete SBO          | Alcoholic cirrhosis, orthotopic liver transplant | No                        |
| 3       | 37          | Male   | mCRC      | FOLFOXIRI                     | Colovesicular fistula | None                                             | No                        |

2 mCRC, metastatic colorectal cancer; SBO, small bowel obstruction; LBO, large bowel obstruction
